# Supplementary material for: Compatibility in the Ustilago maydis–Maize Interaction Requires Inhibition of Host Cysteine Proteases by the Fungal Effector Pit2
Source: PubMed Central journal article supplement (PMC3573112; doi:10.1371/journal.ppat.1003177), 2013-02-14
Supplement: ppat.1003177.s004.pdf [file ppat.1003177.s004.pdf]

# Figure S4

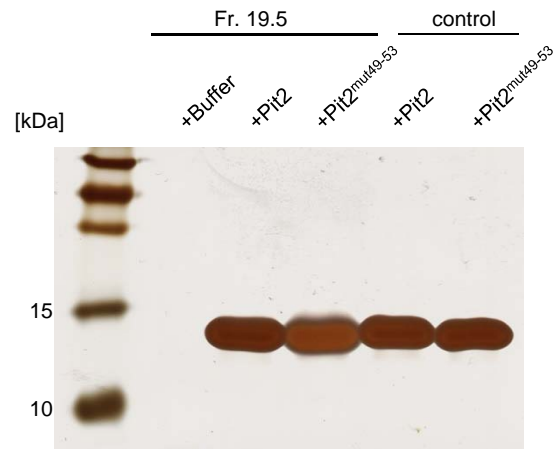

**Figure S4:** Silver stained SDS-PAGE showing FPLC purified Pit2 and Pit2<sup>mut49-53</sup>. Treatment of both Pit2 versions with apoplastic protease fraction 19.5ml (Fraction 19.5; see Figure 2B) does not generate detectable degradation products.
