# Supplementary material for: Compatibility in the Ustilago maydis–Maize Interaction Requires Inhibition of Host Cysteine Proteases by the Fungal Effector Pit2
Source: PubMed Central journal article supplement (PMC3573112; doi:10.1371/journal.ppat.1003177), 2013-02-14
Supplement: ppat.1003177.s005.pdf [file ppat.1003177.s005.pdf]

Figure S5

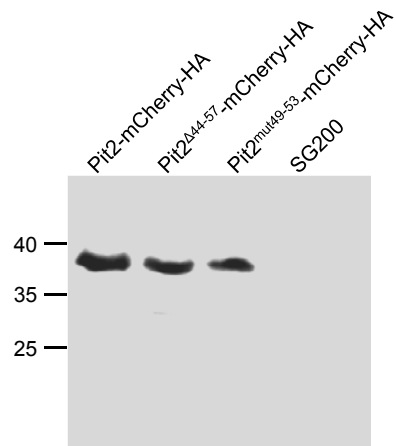

**Figure S5:** Western Blot analysis to test stability of mCherry-HA tagged Pit2-fusion-proteins expressed by *U. maydis* during plant infection. Protein extracts of *U. maydis* infected maize leaves were probed using anti-HA-antibodies. Expected sizes for Pit2-mCherry-HA: 38.8kDa, Pit2 $\Delta$ 44-57-mCherry-HA: 37kDa, Pit2<sup>mut49-53</sup>-mCherry-HA: 38.4kDa. No signal was detected in samples from maize leaves that were infected with the *U. maydis* wild type strain SG200.
